# Supplementary material for: An electrochemical sensor for selective determination of sulfamethoxazole in surface water using a molecularly imprinted polymer modified BDD electrode
Source: Royal Society of Chemistry journal article supplement (doi:10.1039/c4ay03055a), 2015-01-01
Supplement: c4ay03055a1.pdf [file c4ay03055a1.pdf]

## Supplementary Information

### Electrochemical sensor for selective determination of Sulfamethoxazole in surface water using a molecularly imprinted polymer modified BDD electrode

Yang Zhao<sup>a</sup>, Fang Yuan<sup>a</sup>, Xie Quan<sup>a\*</sup>, Hongtao Yu<sup>a</sup>, Shuo Chen<sup>a</sup>, Huimin Zhao<sup>a</sup>, Zhaoyang Liu<sup>b</sup>, Nidal Hilal<sup>b</sup>

<sup>a</sup> Key Laboratory of Industrial Ecology and Environmental Engineering (Ministry of Education, China), School of Environmental Science and Technology, Dalian University of Technology, Dalian 116024, China.

<sup>b</sup> Qatar Environment and Energy Research Institute, Qatar Foundation, PO Box 5825, Doha, Qatar.

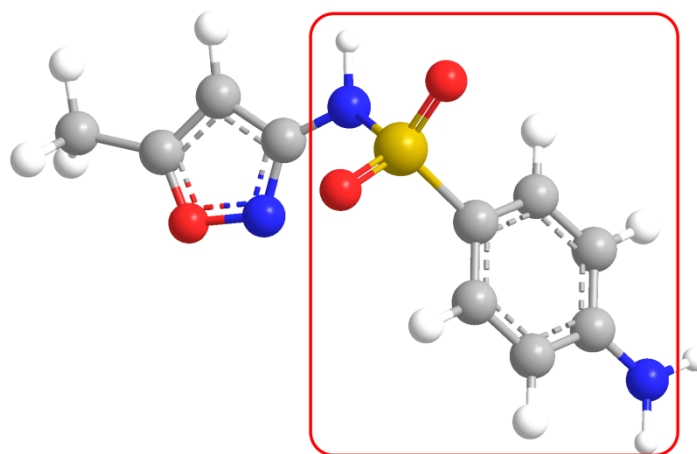

**Figure S1** Chemical structure of SMX and parent structure of sulfonamides (inside of red frame), Carbon atoms (dark gray balls), hydrogen atoms (white balls), oxygen atoms (red balls), nitrogen atoms (blue balls) and sulfur atom (yellow ball).

**Table S1** Index of lake water quality.

| Constituent                | Value | Standard* |
|----------------------------|-------|-----------|
| pH                         | 7.1   | 6-9       |
| COD <sub>Mn</sub> (mg / L) | 4.3   | 6         |
| TOC (mg / L)               | 13.20 | --        |

\*GHZBI, China (GB3838-2002, Category III)

**Table S2** Settings of orthogonal experimental factors and level.

| Factors<br>Levels | pH  | $c_{\text{SMX}} / \text{mM}$ | $c_{\text{Py}} / \text{mM}$ | cycles |
|-------------------|-----|------------------------------|-----------------------------|--------|
| 1                 | 7   | 10                           | 40                          | 4      |
| 2                 | 7.5 | 20                           | 60                          | 5      |
| 3                 | 8   | 30                           | 80                          | 6      |
| 4                 | 9   | 40                           | 20                          | 7      |

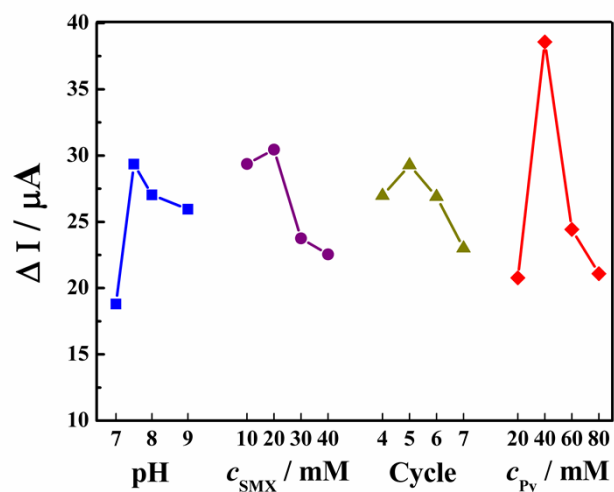

**Figure S2** Effect of pH, template concentration, electro-polymerization cycles and monomer concentration on MIP/BDD with SMX concentration 100  $\mu\text{M}$ , the response current is measured through SWV in pH 7.0 PBS.

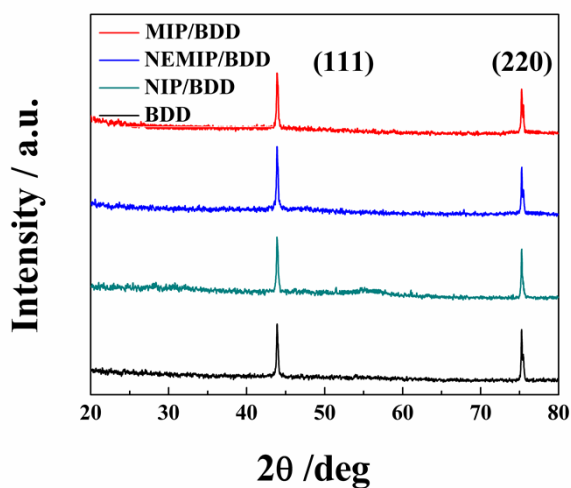

**Figure S3** XRD for different electrodes.

**Table S3** Range analysis of orthogonal experiment.

| Factors<br>No.            | pH     | cSMX   | cPy    | cycles | Current ( $\mu\text{A}$ ) |
|---------------------------|--------|--------|--------|--------|---------------------------|
| 1                         | 1      | 1      | 1      | 1      | 33.3                      |
| 2                         | 1      | 2      | 2      | 2      | 26.6                      |
| 3                         | 1      | 3      | 3      | 3      | 13.24                     |
| 4                         | 1      | 4      | 4      | 4      | 2.68                      |
| 5                         | 2      | 1      | 2      | 3      | 27                        |
| 6                         | 2      | 2      | 1      | 4      | 42.8                      |
| 7                         | 2      | 3      | 4      | 1      | 24.5                      |
| 8                         | 2      | 4      | 3      | 2      | 23.1                      |
| 9                         | 3      | 1      | 3      | 4      | 25.4                      |
| 10                        | 3      | 2      | 4      | 3      | 24.7                      |
| 11                        | 3      | 3      | 1      | 2      | 35.6                      |
| 12                        | 3      | 4      | 2      | 1      | 22.4                      |
| 13                        | 4      | 1      | 4      | 2      | 31.8                      |
| 14                        | 4      | 2      | 3      | 1      | 27.7                      |
| 15                        | 4      | 3      | 2      | 4      | 21.7                      |
| 16                        | 4      | 4      | 1      | 3      | 22.6                      |
| $K_1$                     | 82.82  | 117.5  | 134.3  | 107.9  |                           |
| $K_2$                     | 117.4  | 121.8  | 97.7   | 117.1  |                           |
| $K_3$                     | 108.1  | 102.04 | 91.34  | 94.54  |                           |
| $K_4$                     | 103.8  | 70.78  | 83.68  | 92.58  |                           |
| $k_1$                     | 20.705 | 29.375 | 33.575 | 26.975 |                           |
| $k_2$                     | 29.35  | 30.45  | 24.425 | 29.275 |                           |
| $k_3$                     | 27.025 | 25.51  | 22.835 | 23.635 |                           |
| $k_4$                     | 25.95  | 17.695 | 20.92  | 23.145 |                           |
| Range                     | 8.645  | 12.755 | 12.655 | 6.13   |                           |
| Optimization<br>condition | A2     | B2     | C1     | D2     |                           |

$K_i$  ( $\mu\text{A}$ ), Sum value of current of factor under level  $i$ ;  $k_i$  ( $\mu\text{A}$ ), Average value of current of factor under level  $i$ .

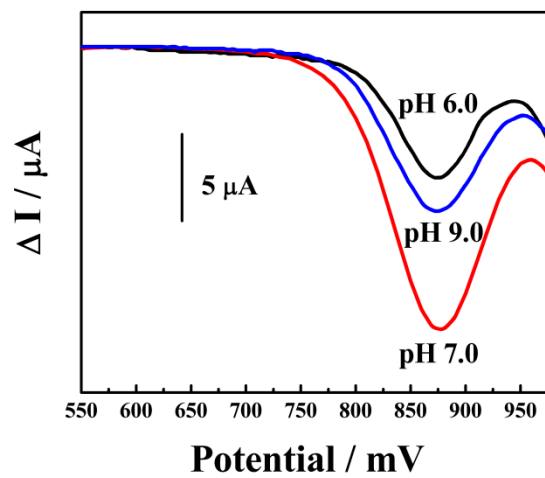

**Figure S4** SWV responses of 50  $\mu\text{M}$  SMX at MIP/BDD electrode in PBS solution (pH 6.0, 7.0, 9.0).
